# Supplementary material for: Risk of cancer in children and young adults conceived by assisted reproductive technology
Source: Oxford University Press journal article supplement (doi:10.1093/humrep/dey394), 2018-12-23
Supplement: dey394_supplementary_table_si.pdf [file dey394_supplementary_table_si.pdf]

**Supplementary Table S1 Perinatal factors and risk of cancer; Cox regression analyses**

|                                         | Total no. | No. of cancers | Age-adjusted HR (95% CI) <sup>a,b</sup> |
|-----------------------------------------|-----------|----------------|-----------------------------------------|
| Multiple birth                          |           |                |                                         |
| Singleton                               | 38 422    | 196            | 1.0 (reference)                         |
| Multiple                                | 9268      | 35             | 0.99 (0.69–1.44)                        |
| Maternal age (years)                    |           |                |                                         |
| <30                                     | 13 086    | 98             | 1.0 (reference)                         |
| 30–34                                   | 18 027    | 77             | 1.04 (0.75–1.45)                        |
| ≥35                                     | 16 577    | 56             | 0.96 (0.67–1.39)                        |
| Sex <sup>c</sup>                        |           |                |                                         |
| Male                                    | 23 376    | 115            | 1.0 (reference)                         |
| Female                                  | 21 922    | 106            | 0.96 (0.74–1.24)                        |
| Birthweight (g) <sup>d</sup>            |           |                |                                         |
| <2500                                   | 9037      | 42             | 1.22 (0.82–1.82)                        |
| 2500–2999                               | 9894      | 53             | 1.30 (0.89–1.89)                        |
| 3000–3499                               | 13 552    | 57             | 1.0 (reference)                         |
| 3500–3999                               | 10 447    | 55             | 1.28 (0.88–1.85)                        |
| ≥4000                                   | 4760      | 24             | 1.28 (0.79–2.06)                        |
| Gestational length (weeks) <sup>e</sup> |           |                |                                         |
| ≥37                                     | 37 495    | 180            | 1.0 (reference)                         |
| <37                                     | 10 195    | 51             | 1.12 (0.82–1.52)                        |

HR = hazard ratio.

<sup>a</sup>There were no confounding factors.<sup>b</sup>Each variable was analyzed in a separate regression analysis.<sup>c</sup>Missing values were imputed (5%).<sup>d</sup>Missing values were imputed (43%).<sup>e</sup>Missing values were imputed (43%).
