# Supplementary material for: Risk of cancer in children and young adults conceived by assisted reproductive technology
Source: Oxford University Press journal article supplement (doi:10.1093/humrep/dey394), 2018-12-23
Supplement: dey394_supplementary_table_sii.pdf [file dey394_supplementary_table_sii.pdf]

**Supplementary Table SII Risk of cancer before age 18 and from age 18 onwards; Cox regression analyses.**

|                                                 | Till 18 years |                |                          | From 18 years |                |                               |
|-------------------------------------------------|---------------|----------------|--------------------------|---------------|----------------|-------------------------------|
|                                                 | Total no.     | No. of cancers | Age-adjusted HR (95% CI) | Total no.     | No. of cancers | Age-adjusted HR (95% CI)      |
| ART versus no ART                               |               |                |                          |               |                |                               |
| Non-ART                                         | 23 421        | 60             | 1.0 (reference)          | 18 746        | 78             | 1.0 (reference)               |
| ART                                             | 24 269        | 69             | 1.02 (0.72–4.44)         | 15 265        | 24             | 1.31 (0.79–2.18)              |
| ART- or FD-conceived versus naturally conceived |               |                |                          |               |                |                               |
| Naturally conceived                             | 13 761        | 37             | 1.0 (reference)          | 11 397        | 55             | 1.0 (reference)               |
| ART-conceived                                   | 24 269        | 69             | 0.95 (0.64–1.42)         | 15 265        | 24             | 1.25 (0.73–2.13) <sup>b</sup> |
| FD-conceived (non-ART) <sup>a</sup>             | 4181          | 9              | 0.74 (0.36–1.53)         | 2705          | 4              | 0.78 (0.28–2.18)              |

FD = fertility drug; HR = hazard ratio.

<sup>a</sup>Children conceived by fertility drugs (with/without intrauterine insemination).

<sup>b</sup>Sensitivity analyses from age 18 onwards with censoring at age 35 (because of the slightly older age of naturally conceived children) showed comparable results (age-adjusted HR = 1.23, 95% CI: 0.72–2.10).
