# Supplementary material for: Risk of cancer in children and young adults conceived by assisted reproductive technology
Source: Oxford University Press journal article supplement (doi:10.1093/humrep/dey394), 2018-12-23
Supplement: dey394_supplementary_table_siii.pdf [file dey394_supplementary_table_siii.pdf]

**Supplementary Table SIII Conception method and cancer risk (classified according to cell type); Cox regression analyses.**

| Conception method      | Total No. | Sarcoma <sup>b</sup> |                                   | Blastoma <sup>c</sup> |                                   | Carcinoma <sup>d</sup> |                                   | Melanoma <sup>e</sup> |                                   | Lymphohematopoietic malignancies <sup>f</sup> |                                   | Other malignancies <sup>g</sup> |                          |
|------------------------|-----------|----------------------|-----------------------------------|-----------------------|-----------------------------------|------------------------|-----------------------------------|-----------------------|-----------------------------------|-----------------------------------------------|-----------------------------------|---------------------------------|--------------------------|
|                        |           | No. of cancers       | Adjusted HR (95% CI) <sup>h</sup> | No. of cancers        | Adjusted HR (95% CI) <sup>h</sup> | No. of cancers         | Adjusted HR (95% CI) <sup>i</sup> | No. of cancers        | Adjusted HR (95% CI) <sup>h</sup> | No. of cancers                                | Adjusted HR (95% CI) <sup>i</sup> | No. of cancers                  | Age-adjusted HR (95% CI) |
| Naturally conceived    | 13 761    | 9                    | 1.0 (reference)                   | 7                     | 1.0 (reference)                   | 36                     | 1.0 (reference)                   | 9                     | 1.0 (reference)                   | 25                                            | 1.0 (reference)                   | 6                               | 1.0 (reference)          |
| ART-conceived          | 24 269    | 11                   | 0.85 (0.33–2.19)                  | 13                    | 1.29 (0.49–3.45)                  | 12                     | 0.99 (0.45–2.20)                  | 10                    | 1.86 (0.66–5.27)                  | 38                                            | 1.17 (0.66–2.08)                  | 9                               | 1.07 (0.37–3.12)         |
| FD-conceived (non-ART) | 4181      | 0                    | –                                 | 5                     | 2.54 (0.76–8.46)                  | 1                      | 0.32 (0.04–2.35)                  | 2                     | 1.42 (0.29–6.99)                  | 4                                             | 0.67 (0.23–2.01)                  | 1                               | 0.66 (0.79–5.57)         |
| Non-ART <sup>a</sup>   | 23 421    | 13                   | 1.0 (reference)                   | 16                    | 1.0 (reference)                   | 44                     | 1.0 (reference)                   | 16                    | 1.0 (reference)                   | 38                                            | 1.0 (reference)                   | 10                              | 1.0 (reference)          |
| ART                    | 24 269    | 11                   | 0.96 (0.41–2.24)                  | 13                    | 0.99 (0.46–2.15)                  | 12                     | 1.26 (0.58–2.73)                  | 10                    | 1.75 (0.72–4.26)                  | 38                                            | 1.28 (0.77–2.14)                  | 9                               | 1.07 (0.42–2.72)         |

FD = fertility drug; HR = hazard ratio.

<sup>a</sup>Non-ART includes naturally conceived children and children conceived by FDs (with/without intrauterine insemination).

<sup>b</sup>Tumors with the following morphology codes were classified as sarcoma: 8801, 8804, 8900, 8910, 8912, 8964, 9180, 9181, 9183, 9186, 9220, 9221, 9260; i.e. central/medullary osteosarcoma, chondroblastic osteosarcoma, chondrosarcoma, embryonal rhabdomyosarcoma, epithelioid sarcoma, Ewing sarcoma, clear cell kidney sarcoma, juxta cortical chondrosarcoma, osteosarcoma, rhabdomyosarcoma, coil cell rhabdomyosarcoma, spindle cell sarcoma, telangiectatic osteosarcoma.

<sup>c</sup>Tumors with the following morphology codes were classified as blastoma: 8960, 9071, 9080, 9490, 9500, 9470, 9510, 9511, 8000, 8972, 9064, 9061; i.e. Yolk sac tumor, ganglioneuroblastoma, mixed germ cell tumor, medulloblastoma, nephroblastoma (Wilms tumor), neoplasma, neuroblastoma, retinoblastoma, seminoma, teratoma.

<sup>d</sup>Tumors with the following morphology codes were classified as carcinoma: 8046, 8070, 8074, 8076, 8091, 8092, 8097, 8130, 8140, 8240, 8260, 8310, 8340, 8380, 8430, 8500, 8524, 8550, 8551, 9070, 9081, 9101, 9390; i.e. acinar cell cystadenocarcinoma, acinar cell carcinoma, adenocarcinoma, nodular basal cell carcinoma, carcinoid, choriocarcinoma, ductal carcinoma, embryonal carcinoma, endometrioid carcinoma, clear cell adenocarcinoma, invasive basal cell carcinoma, lobular carcinoma, mucoepidermoid carcinoma, multifocal superficial basal cell carcinoma, non-small cell carcinoma, papillary adenocarcinoma (follicular variant), papillary urothelial carcinoma, papilloma plexus choroideus, squamous cell carcinoma, teratocarcinoma.

<sup>e</sup>Tumors with the following morphology codes were classified as melanoma: 8720, 8721, 8743; i.e. skin melanoma and penile melanoma.

<sup>f</sup>Tumors with the following morphology codes were classified as hematologic malignancies: 9590, 9596, 9650, 9651, 9659, 9663, 9665, 9667, 9679, 9680, 9687, 9699, 9702, 9709, 9714, 9729, 9751, 9815, 9821, 9835, 9836, 9837, 9861, 9873, 9891, 9896, 9897, 9910, 9962, 9983; i.e. Hodgkin lymphoma, acute lymphatic leukemia, acute megakaryoblastic leukemia, acute myeloid leukemia, anaplastic large cell b cell lymphoma, essential thrombocythemia, mixed Hodgkin and non-Hodgkin lymphoma, lymphocyte rich Hodgkin lymphoma, nodular sclerosis Hodgkin lymphoma, Langerhans cell histiocytosis, lymphoblastic leukemia lymphoma, malignant lymphoma, marginal zone lymphoma, mature peripheral t cell lymphoma, mediastinal large cell b cell lymphoma, nodular lymphocyte predominant Hodgkin lymphoma, precursor t cell lymphoblastic lymphoma, refractory anemia with excess blasts (RAEB), t cell lymphoblastic leukemia lymphoma.

<sup>g</sup>Tumors with the following morphology codes were classified as other cancers: 9060, 9261, 9380, 9382, 9391, 9400, 9424, 9451, 9473; i.e. adamantinoma of long bones, astrocytoma, dysgerminoma, ependymoma, mixed glioma, glioma, anaplastic oligodendroglioma, pleiomorf xanthoastrocytoma, primitive neuroectodermal tumor.

<sup>h</sup>Additionally adjusted for parental cause of subfertility.

<sup>i</sup>Additionally adjusted for maternal age.

<sup>j</sup>Additionally adjusted for start year of subfertility treatment.
